# Supplementary material
Source: PubMed Central journal article supplement (PMC4634637)
Supplement: NIHMS732405-supplement-Figure_e.pdf [file NIHMS732405-supplement-Figure_e.pdf]

## Supplementary Online Content

Brody AL, Mukhin AG, Mamoun MS, et al. Brain nicotinic acetylcholine receptor availability and response to smoking cessation treatment: a randomized trial. *JAMA Psychiatry*. Published online May 21, 2014.  
doi:10.1001/jamapsychiatry.2014.138.

**eFigure.** Consolidated Standards for Reporting of Trials Flow Diagram of Participants

**eAppendix.** Abstinence Period and Positron Emission Tomography (PET)/Computed Tomography (CT) Protocol

**eReferences**

This supplementary material has been provided by the authors to give readers additional information about their work.

**eFigure.** Consolidated Standards for Reporting of Trials Flow Diagram of Participants

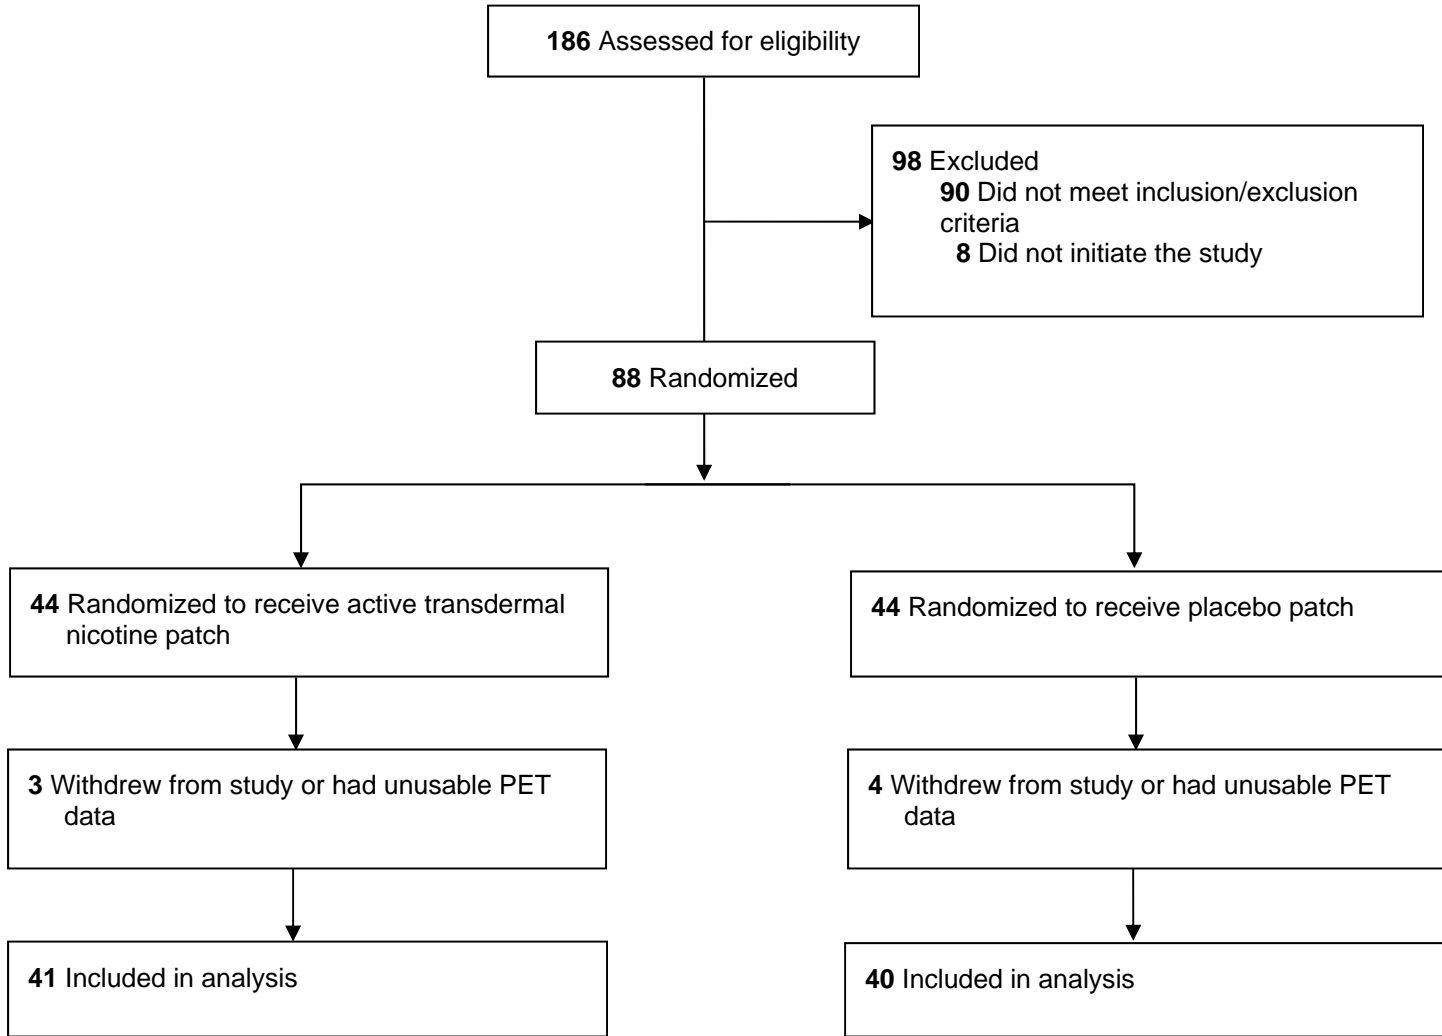

## eAppendix. Abstinence Period and Positron Emission Tomography (PET)/Computed Tomography (CT) Protocol

Participants began smoking/nicotine abstinence two nights prior to the PET/CT session to minimize the impact of nicotine in the body on radiotracer binding. For this abstinence period, participants were monitored as described previously.<sup>1,2</sup> On the day of PET/CT scanning, participants arrived at 11AM, reported on their abstinence, and had exhaled CO measurements of  $\leq 4$  ppm to verify at least 36 h of smoking abstinence. At 12PM, bolus-plus-continuous-infusion of 2-FA was initiated, with a mean 147 MBq of 2-FA administered as an intravenous bolus in 5 mL saline over 10 seconds. This same amount of 2-FA was diluted in 60 ml saline, and 51.1 ml was infused over the next 420 min (7.3 ml/h). Participants remained seated in a room adjacent to the PET/CT scanner for the next 4 h to allow the radiotracer to reach a relatively steady state in brain. At 4PM, PET scans were acquired as a series of 10-min frames for the next 3 h, with a 10-min break.

PET/CT scans were obtained with the Philips Gemini TruFlight scanner (Koninklijke Philips Electronics N.V., Eindhoven, the Netherlands), a 3-dimensional PET/CT scanner, operated in non-TOF mode. Reconstruction was done using Fourier rebinning and filtered back projection, and scatter and random corrections were applied. Mean spatial resolution (FWHM) was 5.0 mm (transverse) by 4.8 mm (axial). 2-FA was prepared using a published method.<sup>3</sup> Each participant also underwent an MRI scan of the brain within a week of PET/CT scanning with the same specifications as in prior reports.<sup>1,2</sup> Blood samples were drawn during PET scanning for determinations of free, unmetabolized 2-FA and nicotine plasma levels, as described previously.<sup>1,2</sup>

### Vs/fp Calculation

To determine  $V_S/f_P$  values, total binding volume of distribution ( $V_T/f_P$ ) values were calculated from the seventeen 10-min PET frames, as the ratio  $C_T/(C_P \cdot f_P)$ , where  $C_T$  is the mean total decay-corrected concentration of 2-FA in the ROIs, ( $C_P \cdot f_P$ ) is the mean decay-corrected concentration of free 2-FA in plasma, and  $f_P$  is the fraction of free (unbound) 2-FA in plasma.  $V_S/f_P$  was then calculated as  $V_S/f_P = V_T/f_P - V_{ND}/f_P$ , where  $V_{ND}/f_P$  was the non-displaceable volume of distribution for each ROI determined from prior research.<sup>4,5</sup> While we recognize that calculating  $V_S/f_P$  in this manner does not change the overall study statistics (compared to simply using  $V_T/f_P$ ), we used this value because it allowed for the most accurate comparison of nAChR availability between smokers in this study and non-smokers from prior research (see Results section). In addition, for scans in which participants had measurable plasma nicotine concentrations,  $V_S/f_P$  values were corrected for nicotine levels at the time of scanning using the following equation:  $V_S/f_P = (V_S/f_P)_{obs} \times (1 + I/IC_{50})$ , where  $(V_S/f_P)_{obs}$  is the observed value of specific binding volume of distribution,  $I$  is the plasma nicotine level at the time of scanning, and  $IC_{50}$  is the plasma nicotine concentration resulting in 50% reduction in  $V_S/f_P$ .<sup>5</sup> This plasma nicotine correction did not change overall study results.

## eReferences

1. Brody AL, Mukhin AG, La Charite J, et al. Up-regulation of nicotinic acetylcholine receptors in menthol cigarette smokers. *International Journal of Neuropsychopharmacology*. Jun 2013;16(5):957-966.
2. Brody AL, Mukhin AG, Shulenberger S, et al. Treatment for tobacco dependence: effect on brain nicotinic acetylcholine receptor density. *Neuropsychopharmacology*. Jul 2013;38(8):1548-1556.

3. Dolle F, Valette H, Bottlaender M, et al. Synthesis of 2-[F-18]fluoro-3-[2(S)-2-azetidinylmethoxy]pyridine, a highly potent radioligand for in vivo imaging central nicotinic acetylcholine receptors. *Journal of Labelled Compounds & Radiopharmaceuticals*. 1998;41(5):451-463.
4. Lotfipour S, Mandelkern M, Alvarez-Estrada M, Brody AL. A single administration of low-dose varenicline saturates alpha4beta2\* nicotinic acetylcholine receptors in the human brain. *Neuropsychopharmacology*. Jun 2012;37(7):1738-1748.
5. Brody AL, Mandelkern MA, London ED, et al. Cigarette smoking saturates brain alpha4beta2 nicotinic acetylcholine receptors. *Arch.Gen.Psychiatry*. 2006;63(8):907-915.
